# Supplementary material for: Activation of the Keap1/Nrf2 stress response pathway in autophagic vacuolar myopathies
Source: PubMed Central journal article supplement (PMC5088660; doi:10.1186/s40478-016-0384-6), 2016-10-31
Supplement: 40478_2016_384_MOESM1_ESM.pdf [file 40478_2016_384_MOESM1_ESM.pdf]

| <b>Diagnostic criterion</b>                          | <b>PM</b>                      | <b>IBM</b>         |
|------------------------------------------------------|--------------------------------|--------------------|
| Lymphocytic endomysial inflammation <sup>&amp;</sup> | Present                        |                    |
| Inflammatory infiltrate composition <sup>#</sup>     | T-cell rich, B-cell poor       |                    |
| Degenerating / regenerating fibers <sup>&amp;</sup>  | Present in random distribution |                    |
| Fiber invasion <sup>#</sup>                          | Present                        |                    |
| Diffuse MHC-1 positivity <sup>#</sup>                | Present                        |                    |
| Percentage of COX-negative fibers <sup>&amp;,*</sup> | <1%                            | Any (usually >1%)  |
| Ragged red fibers <sup>&amp;,*</sup>                 | Absent                         | Usually present    |
| Endomysial fibrosis <sup>&amp;</sup>                 | None or mild                   | Moderate to severe |
| Fiber size variation <sup>&amp;</sup>                | None or mild                   | Moderate to severe |
| Rimmed vacuoles <sup>&amp;</sup>                     | Absent                         | Present            |

**Additional file 1: Table S1: Summary of diagnostic criteria used for PM and IBM case classification; adapted from reference [15].**

<sup>&</sup> Main criteria (required for diagnosis / classification)

<sup>#</sup> Supporting criteria

<sup>\*</sup> Criteria important for distinguishing classic PM from PM with COX-negative fibers (an IBM precursor condition); see reference [15] for details.
