# Supplementary material for: Activation of the Keap1/Nrf2 stress response pathway in autophagic vacuolar myopathies
Source: PubMed Central journal article supplement (PMC5088660; doi:10.1186/s40478-016-0384-6), 2016-10-31

Figure S1

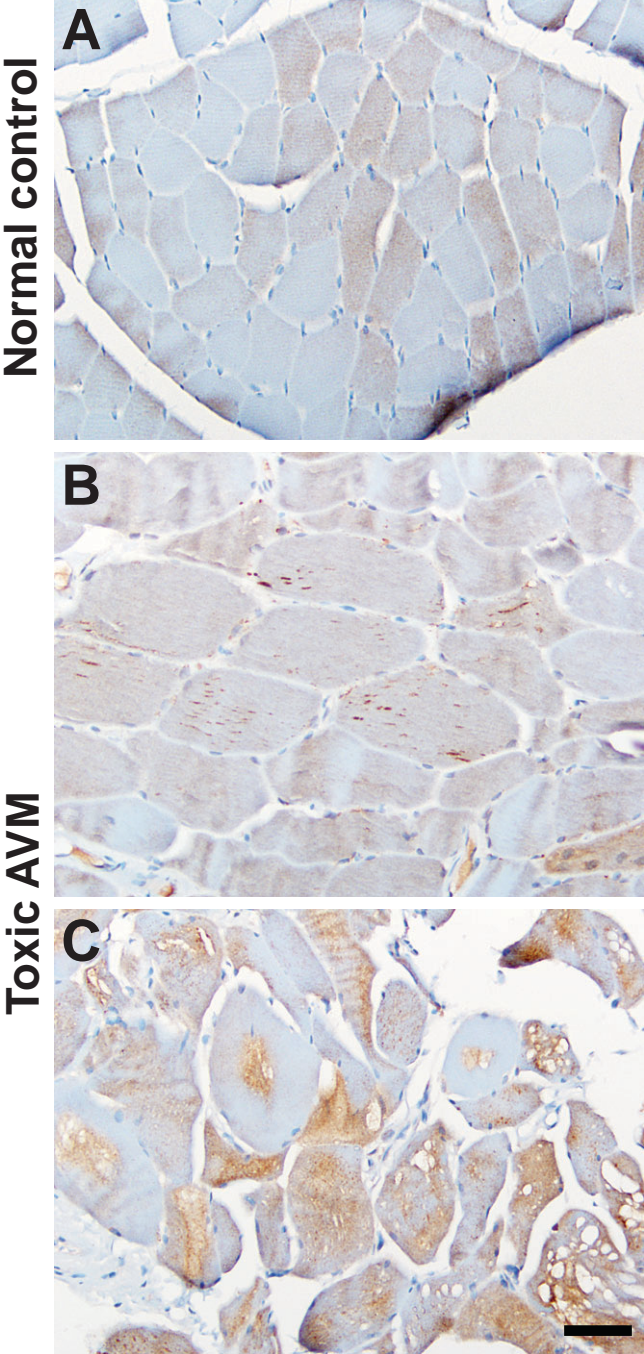

Supplement: 40478_2016_384_MOESM2_ESM.pdf [file 40478_2016_384_MOESM2_ESM.pdf]
