# Supplementary material for: Activation of the Keap1/Nrf2 stress response pathway in autophagic vacuolar myopathies
Source: PubMed Central journal article supplement (PMC5088660; doi:10.1186/s40478-016-0384-6), 2016-10-31
Supplement: 40478_2016_384_MOESM3_ESM.pdf [file 40478_2016_384_MOESM3_ESM.pdf]

| Subject ID                  | Gsr<br>(ng standard) | Nqo1<br>(ng standard) | G6pd<br>(ng standard) | Hmox1<br>(ng standard) | Gclm<br>(ng standard) | Gclc<br>(ng standard) |
|-----------------------------|----------------------|-----------------------|-----------------------|------------------------|-----------------------|-----------------------|
| <b>Normal control group</b> |                      |                       |                       |                        |                       |                       |
| 1                           | 0.110                | 0.595                 | 0.010                 | 4.820                  | 1.698                 | 0.060                 |
| 2                           | 0.048                | 0.869                 | 0.006                 | 0.178                  | 0.173                 | 0.000                 |
| 5                           | 0.025                | 0.082                 | 0.006                 | 0.295                  | 0.040                 | 0.014                 |
| 6                           | 0.028                | 0.143                 | 0.007                 | 0.246                  | 0.107                 | 0.013                 |
| 7                           | 0.014                | 0.214                 | 0.003                 | 0.742                  | 1.293                 | 0.010                 |
| 8                           | 0.003                | 0.028                 | 0.014                 | 0.345                  | 1.222                 | 0.046                 |
| 9                           | 0.012                | 0.114                 | 0.005                 | 0.209                  | 1.163                 | 0.027                 |
| <b>Toxic AVM group</b>      |                      |                       |                       |                        |                       |                       |
| 22                          | 0.494                | 2.111                 | 0.059                 | 5.117                  | 0.425                 | 0.080                 |
| 23                          | 0.066                | 0.424                 | 0.047                 | 4.460                  | 1.294                 | 0.046                 |
| 25                          | 0.607                | 1.468                 | 0.206                 | 1.780                  | 0.097                 | 0.095                 |
| 27                          | 0.623                | 42.593                | 0.110                 | 5.804                  | 2.082                 | 0.080                 |
| 28                          | 1.199                | 36.839                | 0.114                 | 3.711                  | 0.391                 | 0.051                 |
| 29                          | 0.718                | 2.860                 | 0.021                 | 0.045                  | 0.142                 | 0.023                 |
| 30                          | 0.828                | 3.414                 | 0.192                 | 66.378                 | 11.521                | 0.024                 |
| 31                          | 0.630                | 10.546                | 0.087                 | 1.006                  | 0.913                 | 0.057                 |
| 32                          | 0.607                | 0.438                 | 0.036                 | 5.782                  | 0.124                 | 0.055                 |

**Additional file 3: Table S2.** mRNA expression level for a subset of the Nrf2-regulated genes (individual subject data; summary graphs are shown in Fig. 6A).
